# Supplementary material for: Ultrathin graphene nanosheets derived from rice husks for sustainable supercapacitor electrodes
Source: Royal Society of Chemistry journal article supplement (doi:10.1039/c7nj03136j), 2017-01-01
Supplement: c7nj03136j1.pdf [file c7nj03136j1.pdf]

*Supporting Information for*

**Ultrathin graphene nanosheets derived from rice husk for sustainable  
supercapacitor electrodes**

S. Sankar<sup>a</sup>, Hwauk Lee<sup>a</sup>, Hyun Jung<sup>b</sup>, Aran Kim<sup>b</sup>, Abu Talha Aqueel Ahmed<sup>a</sup>, Akbar I. Inamdar<sup>a</sup>,  
Hyungsang Kim<sup>a</sup>, Hyunsik Im<sup>a\*</sup>, Deuk Young Kim<sup>a\*</sup>

<sup>a</sup> *Department of Semiconductor Science, Dongguk University-Seoul, Seoul 04620, South Korea*

<sup>b</sup> *Department of Chemistry, Dongguk University-Seoul, Seoul 04620, South Korea*

\*Corresponding Author:

hyunsik7@dongguk.edu and dykim@dongguk.edu

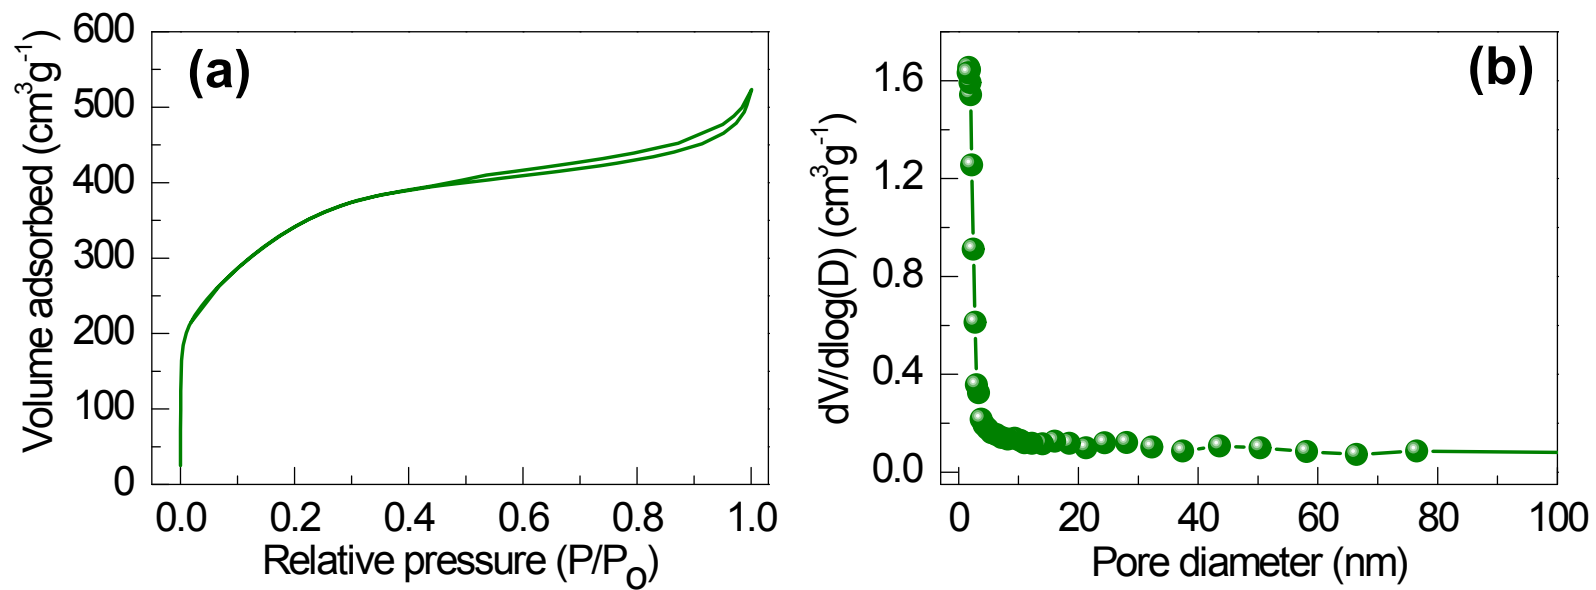

Fig. S1. (a) N<sub>2</sub> adsorption-desorption isotherms and (b) pore size distribution of graphene nanosheets.

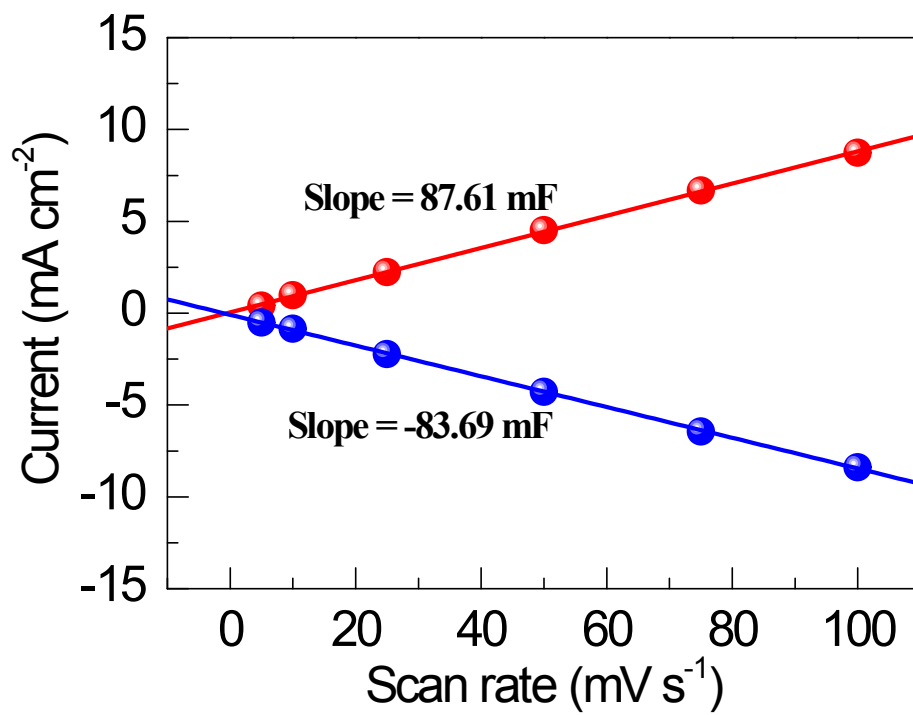

Fig. S2. The linear current measured at 0.2 V vs potential as a function of scan rates for graphene nanosheets.
